# Supplementary material for: Long-term pervaporation performance of microporous methylated silica membranesElectronic Supplementary Information (ESI) available: details of the sol synthesis; GPC and NMR measurements; and additional SEM micrographs. See http://www.rsc.org/suppdata/cc/b4/b401496k/
Source: Royal Society of Chemistry journal article supplement (doi:10.1039/b401496k), 2004-01-01
Supplement: b401496k.pdf [file b401496k.pdf]

## Electronic Supplementary Information

### Sol Preparation

One pure silica sol was prepared using a single-step acid-catalysed hydrolysis of TEOS ( $\text{Si}(\text{OC}_2\text{H}_5)_4$ ) in ethanol ( $\text{C}_2\text{H}_5\text{OH}$ ). Nitric acid ( $\text{HNO}_3$ ) was chosen as catalyst. These reactants were mixed together with distilled water ( $\text{H}_2\text{O}$ ), in the molar ratio  $\text{TEOS} : \text{C}_2\text{H}_5\text{OH} : \text{HNO}_3 : \text{H}_2\text{O} = 1 : 3.8 : 0.085 : 6.5$ . This mixture was refluxed for 3 hours at  $60^\circ\text{C}$  to yield the pure  $\text{SiO}_2$  sol.

One methylated silica sol was prepared analogously to the silica sol. MTES ( $\text{Si}(\text{OC}_2\text{H}_5)_3\text{CH}_3$ ) was used as a source for the methyl groups. A mixture with the same composition as above was refluxed for 2 hours and 45 minutes. At this stage MTES was added in the molar ratio  $\text{MTES} : \text{TEOS} = 1 : 1$ . The mixture thus obtained was further refluxed for another 15 minutes.

Several methylated silica sols with different methyl concentrations were prepared using a two-step process. A mixture with molar ratio  $\text{TEOS} : \text{C}_2\text{H}_5\text{OH} : \text{HNO}_3 : \text{H}_2\text{O} = 1 : 3.8 : 0.0036 : 2.0$  was refluxed at  $60^\circ\text{C}$  for 90 minutes. At this stage MTES was added with a molar ratio  $\text{TEOS} : \text{MTES} = 10 : 1, 10 : 3, 10 : 4, \text{ or } 10 : 6$ , and the reflux was continued for another 30 minutes. This was followed by the addition of more nitric acid and water so that the final molar ratio was  $\text{TEOS} : \text{C}_2\text{H}_5\text{OH} : \text{HNO}_3 : \text{H}_2\text{O} = 1 : 6.2 : 0.0108 : 6.0$  with variable MTES content. Finally, this was refluxed for 3 more hours, before it was diluted with ethanol. We were unable to prepare membranes for the sols with  $\text{TEOS} : \text{MTES} = 10 : 4$  and  $10 : 6$ .

### Gel Permeation Chromatography.

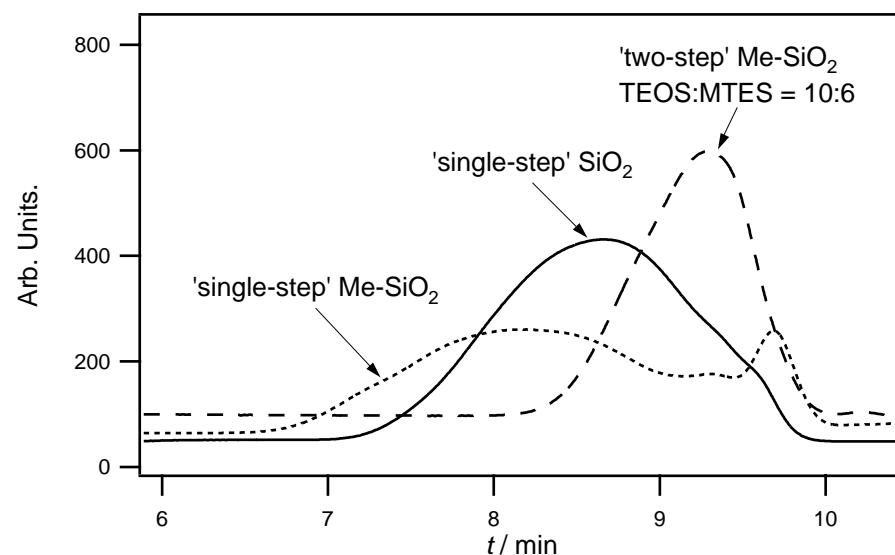

Figure 1S: Particle size distribution as a function of the elution time of the sols prepared with the 'single-step' procedure and the sol prepared with the 'two-step' procedure with  $\text{TEOS}:\text{MTES} = 10:6$ . We were unable to prepare a membrane from this last sol.

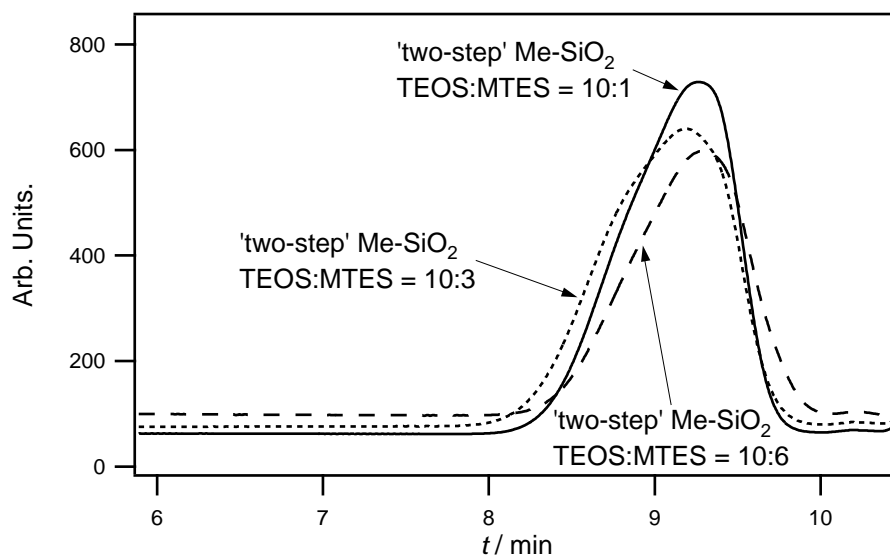

Figure 2S: Particle size distribution as a function of the elution time of the sols prepared with the 'two-step' procedure with TEOS:MTES = 10:1; 10:3, and 10:6. We were unable to prepare a membrane from this last sol.

The molar mass ( $M_w$  in kg/mol) can be calculated from the elution time ( $t$ , min) using  $M_w = 10^{(-0.66t + 6.26)}$ .

## Nuclear Magnetic Resonance

Solid state  $^{29}\text{Si}$  NMR spectra were collected on free-standing films prepared analogously to the membranes. The spectra were recorded on a Bruker MSL300 and Bruker MSL400, using a spinning rate of 4 kHz and one-pulse experiments with  $90^\circ$  pulses and 100 s recycle delay time. The number of acquisitions varies between 200 and 700, which corresponds to a measurement time of 5 to 19 hours. The summed concentration of T groups is equivalent to the methyl concentration.

Table 1S: The concentration of tetrafunctional ( $Q_i$ , from TEOS) and trifunctional ( $T_i$ , from MTES) units in free-standing films prepared from various sols.

| TEOS : MTES             | 10 : 1   | 10 : 3   | 10 : 6   | 10 : 10     |
|-------------------------|----------|----------|----------|-------------|
| preparation route       | two-step | two-step | two-step | single-step |
| $\text{CH}_3/\text{Si}$ | 0.09     | 0.23     | 0.37     | 0.50        |
| $T_{\text{tot}}$        | 0.13     | 0.22     | 0.36     | 0.45        |
| $T_2$                   | 0.02     | 0.05     | 0.13     | 0.22        |
| $T_3$                   | 0.11     | 0.17     | 0.23     | 0.23        |
| $Q_{\text{tot}}$        | 0.88     | 0.79     | 0.65     | 0.55        |
| $Q_2$                   | 0.04     | 0.05     | 0.05     | 0.02        |
| $Q_3$                   | 0.31     | 0.32     | 0.32     | 0.15        |
| $Q_4$                   | 0.52     | 0.42     | 0.28     | 0.38        |

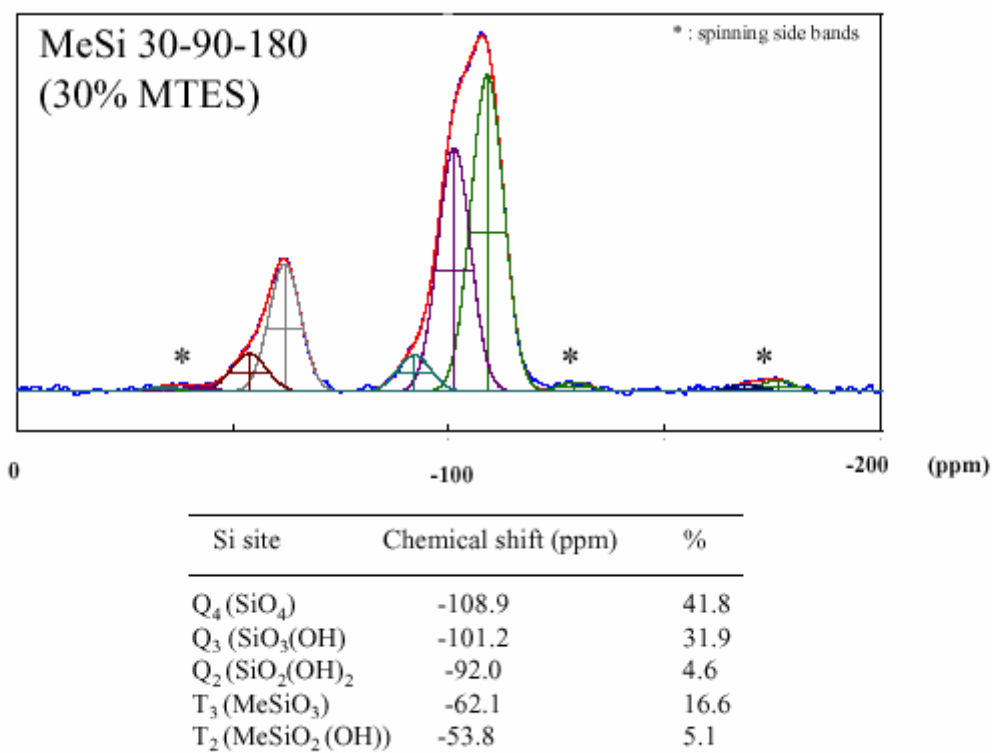

Figure 3S: Sample NMR spectrum including fit and numerical results for a methylated silica film prepared from a 'two-step' sol with initial TEOS : MTES ratio of 10 : 3.

### Scanning Electron Microscopy

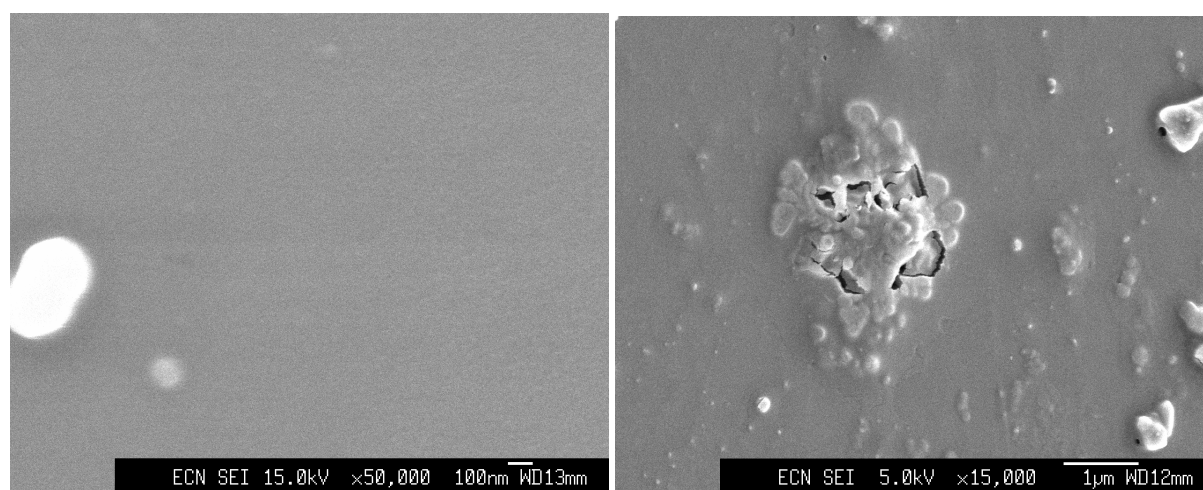

a) b)  
Figure 4S: Two SEM micrographs showing typical surface appearance of a membrane before testing in pervaporation. The great majority of the membrane surface looks like the micrograph in a). Imperfections on the  $\mu\text{m}$  scale, as depicted in b), are present.
